# Supplementary material for: Comparative effectiveness of six Chinese herb formulas for acute exacerbation of chronic obstructive pulmonary disease: a systematic review and network meta-analysis
Source: PubMed Central journal article supplement (PMC6704718; doi:10.1186/s12906-019-2633-2), 2019-08-22
Supplement: 12906_2019_2633_MOESM6_ESM.pdf [file 12906_2019_2633_MOESM6_ESM.pdf]

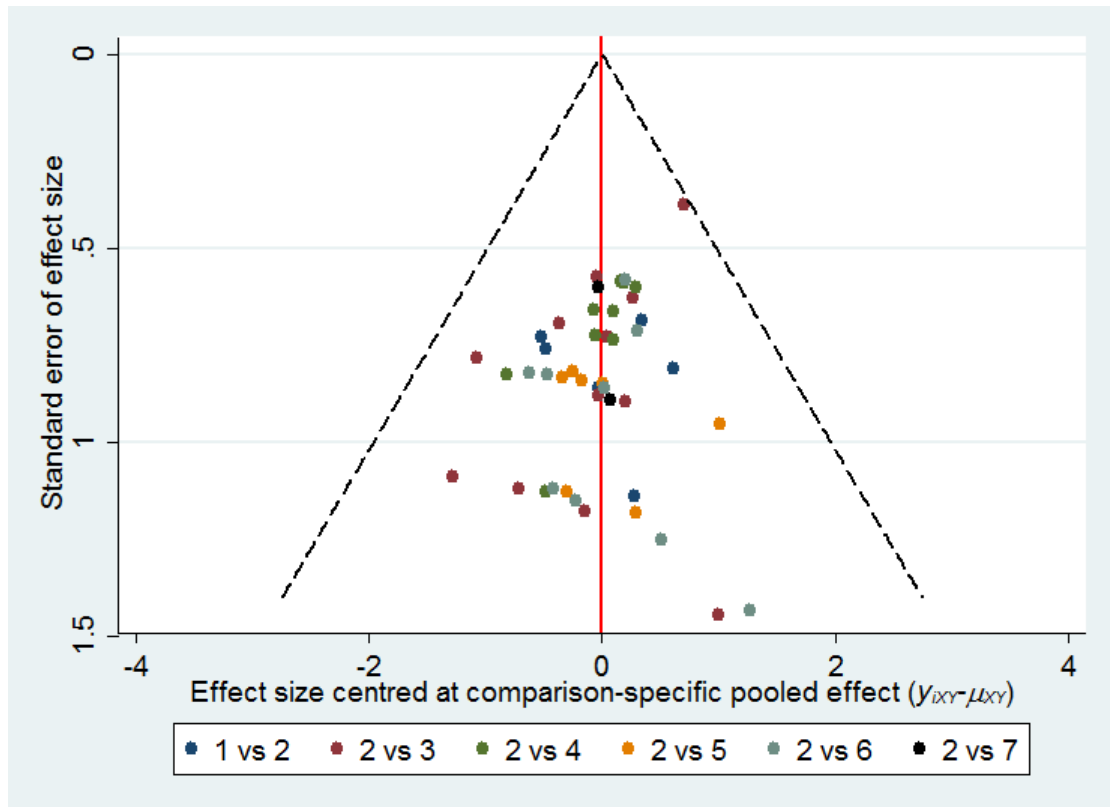

1=DC+RP, 2=RP, 3=MXSG+RP, 4=WJ+RP, 5=QQHT+RP, 6=SBP+RP,  
 7=YBBX+RP
