# Supplementary material for: Comparative effectiveness of six Chinese herb formulas for acute exacerbation of chronic obstructive pulmonary disease: a systematic review and network meta-analysis
Source: BMC Complement Altern Med. 2019 Aug 22;19:226. doi: 10.1186/s12906-019-2633-2 (PMC6704718; doi:10.1186/s12906-019-2633-2)
Supplement: Supplementary file 3 — Summary of Chinese herb formulas. (DOCX 22 kb) [file 12906_2019_2633_MOESM3_ESM.docx]

| Formula name | Herb ingredients  (Pin Yin name)a | Scientific nameb |
| --- | --- | --- |
| Weijing decoction (WJ) | *Wei Jing* | *Phragmites communis Trin.* |
| *Yi Yi Ren* | *Coix lacryma-jobi L. var. mayuen (Roman.) Stapf* |
| *Tao Ren* | *Prunus persica (L.) Batsch.; Prunus davidiana (Carr.) Franch.* |
| *Dong Gua Ren* | *Benincasa hispida (Thunb.) Cogn.* |
| Maxingshigan decoction (MXSG) | *Ma Huang* | *Ephedra sinica Stapf.; Ephedra equisetina Bge.; Ephedra intermedia Schrenk et C.A. Mey.* |
| *Ku Xing Ren* | *Prunus armeniaca L. var. ansu Maxim.; Prunus sibirica L.; Prunus mandshurica (Maxim.) Koehne.; Prunus armeniaca L.* |
| *Shi Gao* | *Hydrated calcium sulfate* |
| *Gan Cao* | *Glycyrrhiza uralensis Fisch.; Glycyrrhiza inflata Bat.; Glycyrrhiza glabra L.* |
| Yuebijiabanxia decoction (YBBX) | *Ma Huang* | *Ephedra sinica Stapf.; Ephedra equisetina Bge.; Ephedra intermedia Schrenk et C.A. Mey.* |
| *Shi Gao* | *Hydrated calcium sulfate* |
| *Sheng Jiang* | *Zingiber officinale Rosc.* |
| *Da Zao* | *Ziziphus jujuba Mill.* |
| *Gan Cao* | *Glycyrrhiza uralensis Fisch.; Glycyrrhiza inflata Bat.; Glycyrrhiza glabra L.* |
| *Ban Xia* | *Pinellia ternata (Thunb.) Breit.* |
| Qingqihuatan decoction (QQHT) | *Chen Pi* | *Citrus reticulata Blanco* |
| *Ku Xing Ren* | *Prunus armeniaca L. var. ansu Maxim.; Prunus sibirica L.; Prunus mandshurica (Maxim.) Koehne.; Prunus armeniaca L.* |
| *Zhi Shi* | *Citrus aurantium L.; Citrus sinensis Osbeck* |
| *Huang Qin* | *Scutellaria baicalensis Georgi* |
| *Gua Lou Ren* | *Trichosanthes kirilowii Maxim.; Trichosanthes rosthronii Harms* |
| *Fu Ling* | *Poria cocos (Schw.) Wolf* |
| *Dan Nan Xing* | *Arisaema erubescens (Wall.) Schott.; Arisaema heterophyllum Bl.; Arisaema amurense Maxim.* |
| *Ban Xia* | *Pinellia ternata (Thunb.) Breit.* |
| Dingchuan decoction (DC) | *Bai Guo* | *Ginkgo biloba L.* |
| *Ma Huang* | *Ephedra sinica Stapf.; Ephedra equisetina Bge.; Ephedra intermedia Schrenk et C.A. Mey.* |
| *Zi Su Zi* | *Perilla frutescens (L.) Britt.* |
| *Gan Cao* | *Glycyrrhiza uralensis Fisch.; Glycyrrhiza inflata Bat.; Glycyrrhiza glabra L.* |
| *Kuan Dong Hua* | *Tussilago farfara L.* |
| *Ku Xing Ren* | *Prunus armeniaca L. var. ansu Maxim.; Prunus sibirica L.; Prunus mandshurica (Maxim.) Koehne.; Prunus armeniaca L.* |
| *Sang Bai Pi* | *Morus alba L.* |
| *Huang Qin* | *Scutellaria baicalensis Georgi* |
| *Fa Ban Xia* | *Pinellia ternata (Thunb.) Breit.* |
| Sangbaipi decoction (SBP) | *Sang Bai Pi* | *Morus alba L.* |
| *Ban Xia* | *Pinellia ternata (Thunb.) Breit.* |
| *Zi Su Zi* | *Perilla frutescens (L.) Britt.* |
| *Ku Xing Ren* | *Prunus armeniaca L. var. ansu Maxim.; Prunus sibirica L.; Prunus mandshurica (Maxim.) Koehne.; Prunus armeniaca L* |
| *Bei Mu* | *Fritillaria thunbergii Miq.* |
| *Zhi Zi* | *Gardenia jasminoides Ellis* |
| *Huang Qin* | *Scutellaria baicalensis Georgi* |
| *Huang Lian* | *Coptis chinensis Franch.; Coptis deltoidea C. Y. Cheng et Hsiao.; Coptis teeta Wall.* |

Note: Some herbs such as *Ephedra sinica* can be toxic and some have been classified as endangered by the IUCN (e.g. *Ginkgo biloba*). The applications of herbs are advised to comply with relevant regulations.

aHerb ingredients based on Great Compendium of Chinese Medical Formulae (Zhong Yi Fang Ji Da Ci Dian).

bScientific names based on Pharmacopoeia of the People’s Republic of China 2015. Some herbs may refer to more than one species.
